# Supplementary material
Source: Springer Nature journal article supplement (https://www.springermedizin.de/resource/supplementary/12957_2007_459_MOESM2_ESM.pdf/9565064)

Disease free survival

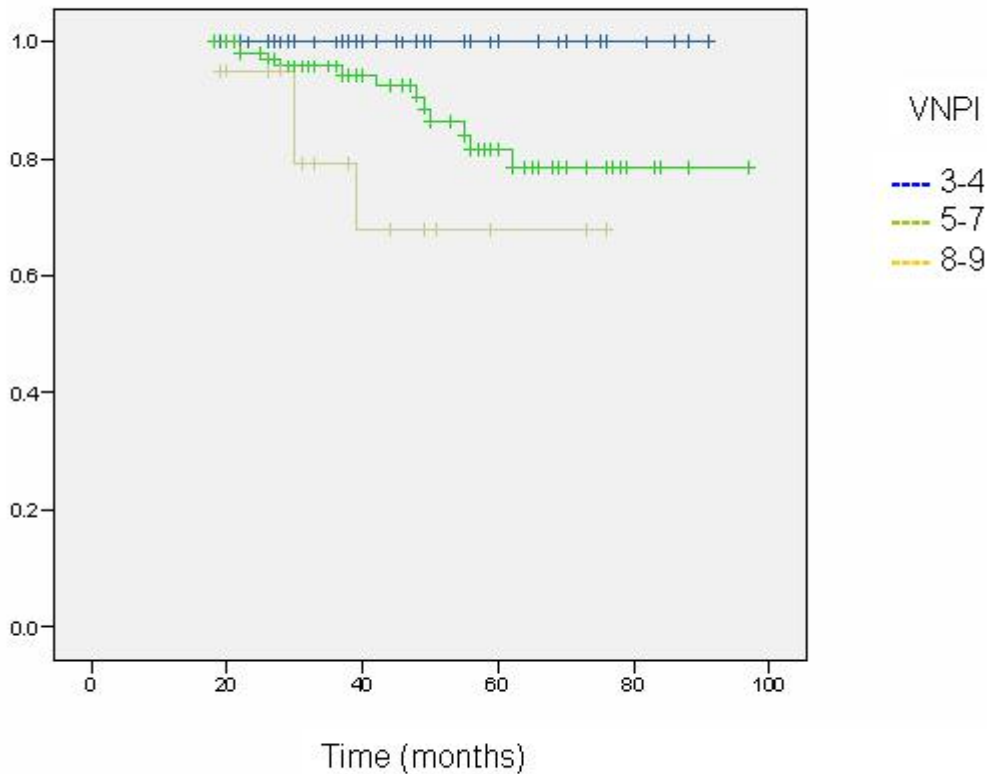

Supplement: MOESM2 [file 9565064]
